# Supplementary material
Source: PubMed Central journal article supplement (PMC5033726)
Supplement: NIHMS812866-supplement-1.pdf [file NIHMS812866-supplement-1.pdf]

## **Inventory of Supplemental information**

1. Main Text figure 1 is supported by Supplemental Figure 1.
2. Main Text figure 2 is supported by Supplemental Figure 2.
3. Main Text figure 3 is supported by Supplemental Figure 3.
4. Main Text figure 4 is supported by Supplemental Figure 4.
5. Main Text figure 5 is supported by Supplemental Figure 5.
6. Main Text figure 6 has no supporting supplemental figures.
7. Main Text figure 7 is supported by Supplemental Figure 6.
